# Supplementary material for: Association study of FLT4 and HYDIN single nucleotide polymorphisms with atrial septal defect susceptibility in the Han Chinese population of Southwest China
Source: Springer Nature journal article supplement (doi:10.1186/s13052-024-01630-z), 2024-04-05
Supplement: MOESM1 [file 26949478]

**Additional file 1: Table S1:** 10 candidate SNPs primer sequences

---

| Site       | Forward primer        | Reverse primer          | Extension primer                                   |
|------------|-----------------------|-------------------------|----------------------------------------------------|
| rs12659700 | CTCCATCCTTGAGGTGAA    | ACCCAGAAATGTGTTATTAGATT | CTGACTTTCCACATGGACCCACACACGCA                      |
| rs383985   | TGGTCTGTTTTGCCCTGGA   | GGAGACGAGCTGGTGAAG      | CTGACTGACTGACTGACTGACTGACTTTGGAAGGGTATCGGCGGGGTCGG |
| rs2589941  | GTGACTCTGGCCCCGCCTCT  | CTACAGCTCCTGCCAAGTGC    | CTGACTGCCTGCGGGGTGGGGCTGACGGCA                     |
| rs3124309  | CTCCGAGTTGTCAGACCT    | AGAGATCCCAGATCCATCA     | CCTGTGCTGGCACCATGGCTACCC                           |
| rs710074   | CCCACCTGCTGTTTACAT    | AGAAGCCACAGACAGAATC     | CTGACTGACTGACTGACTCCGGAGCCGGCTGCTGTGAACTCG         |
| rs6707530  | TTTCTGGGTTCTTCTATCATC | AGTGTCTTGTCTGTATCA      | CTGACTGACTGACTGACTGACTGTGGTCCACATTTGAACAGTAAAG     |
| rs598893   | AATCAGTATTCAGTGAAGC   | CAGGAGTACCAGGACAAG      | GCCACCAAGGGAGAAAAGGTATGA                           |
| rs7198975  | TGCCATGACCACACAGCTGA  | CTCGCCACCTGGGCATTGAC    | CTGACTGACTGAAGCCGCAGAGTTTACAGAGAAG                 |
| rs1774266  | TGCCATGACCACACAGCTGA  | CTCGCCACCTGGGCATTGAC    | CTGACTGACTGACTGAGAAAGGCATCGCCATTATCATTCA           |
| rs11650112 | ACCAGTGCCAGAATTAGG    | AGTCCGCTGTGATAGAGA      | CTGACTGACTACCAAGCCCATTTCCCCACCTCCC                 |

---
